## RESEARCH ARTICLE

# A multivariable analysis to predict variations in hospital mortality using systems-based factors of healthcare delivery to inform improvements to healthcare design within the English NHS

Andrew J. Gardner <sup>1,2</sup>, Søren Rud Kristensen <sup>1\*</sup>

**1** Centre for Health Policy, Imperial College London, London, United Kingdom, **2** William Harvey Research Institute, Critical Care and Perioperative Medicine Research Group, Queen Mary University of London, London, United Kingdom

\* [s.kristensen@imperial.ac.uk](mailto:s.kristensen@imperial.ac.uk)

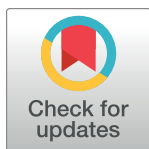

## OPEN ACCESS

**Citation:** Gardner AJ, Kristensen SR (2024) A multivariable analysis to predict variations in hospital mortality using systems-based factors of healthcare delivery to inform improvements to healthcare design within the English NHS. PLoS ONE 19(7): e0303932. <https://doi.org/10.1371/journal.pone.0303932>

**Editor:** Maher Abdelraheim Titi, King Saud University Medical City, SAUDI ARABIA

**Received:** July 22, 2022

**Accepted:** May 3, 2024

**Published:** July 5, 2024

**Copyright:** © 2024 Gardner, Kristensen. This is an open access article distributed under the terms of the [Creative Commons Attribution License](https://creativecommons.org/licenses/by/4.0/), which permits unrestricted use, distribution, and reproduction in any medium, provided the original author and source are credited.

**Data Availability Statement:** The data is available from NHS England: <https://www.england.nhs.uk/statistics/statistical-work-areas/> and NHS Digital: <https://digital.nhs.uk/data-and-information/publications/statistical/shmi>.

**Funding:** The authors received no specific funding for this work. Søren Rud Kristensen was supported by the NIHR Imperial College Patient Safety Translational Research Centre. The funders had no role in study design, data collection and analysis,

## Abstract

Over the last decade, the strain on the English National Health Service (NHS) has increased. This has been especially felt by acute hospital trusts where the volume of admissions has steadily increased. Patient outcomes, including inpatient mortality, vary between trusts. The extent to which these differences are explained by systems-based factors, and whether they are avoidable, is unclear. Few studies have investigated these relationships. A systems-based methodology recognises the complexity of influences on healthcare outcomes. Rather than clinical interventions alone, the resources supporting a patient's treatment journey have near-equal importance. This paper first identifies suitable metrics of resource and demand within healthcare delivery from routinely collected, publicly available, hospital-level data. Then it proceeds to use univariate and multivariable linear regression to associate such systems-based factors with standardised mortality. Three sequential cross-sectional analyses were performed, spanning the last decade. The results of the univariate regression analyses show clear relationships between five out of the six selected predictor variables and standardised mortality. When these five predictors are included within a multivariable regression analysis, they reliably explain approximately 36% of the variation in standardised mortality between hospital trusts. Three factors are consistently statistically significant: the number of doctors per hospital bed, bed occupancy, and the percentage of patients who are placed in a bed within four hours after a decision to admit them. Of these, the number of doctors per bed had the strongest effect. Linear regression assumption testing and a robustness analysis indicate the observations have internal validity. However, our empirical strategy cannot determine causality and our findings should not be interpreted as established causal relationships. This study provides hypothesis-generating evidence of significant relationships between systems-based factors of healthcare delivery and standardised mortality. These have relevance to clinicians and policymakers alike. While

decision to publish, or preparation of the manuscript.

**Competing interests:** The authors have declared that no competing interests exist.

**Abbreviations:** A&E, Accident & Emergency; FHT, Four-hour target; FHATB, Four-hour admission to bed target; SHMI, Summary Hospital-level Mortality Indicator; ICU, Intensive Care Unit; OECD, Organisation for Economic Co-operation and Development; M/ULR, Multivariable/Univariate linear regression; M/UVA, Multivariable/Univariate analysis.

identifying causal relationships between the predictors is left to the future, it establishes an important paradigm for further research.

## 1. Introduction

There are clear variations in hospital inpatient mortality across England, which have been reported in the literature [1,2] and national media [3,4]. Determinants of such variations have been previously cited as the number of emergency admissions, the availability of hospital beds, the number of doctors and critical care bed capacity [1,5–8]. A model which could predict a hospital at risk of excess intra-hospital mortality is desirable, in order to deploy finite health-care resources more effectively. Further, such factors may highlight those NHS Trusts in need of systems-based improvements to their service delivery. Hence, this paper sought to establish associations between intra-hospital variations in the Summary Hospital-level Mortality Indicator (SHMI) and publicly reported variables of hospital activity and resource, and if these relationships change over time. The identified associations highlight the critical relevance of systems factors in determining healthcare outcomes.

### 1.1 Background

Over a century of innovation has revolutionised the scientific understanding of disease and technologies with which to treat it. Independently, the way in which healthcare is delivered to global populations has also been iterated [9]. The growing centralisation of healthcare is an example of this [10]. An idealised health system would ensure available resources are delivered to achieve the best possible population health in the optimal cost-effective manner [11]. However, many barriers prevent this ambition from being achieved, not least by how healthcare systems are designed. A large body of literature has demonstrated the benefits of systems-based approaches internationally [12,13]. These range from improvements in patient outcomes, including reductions in mortality and length of stay, as well as quality of care metrics (e.g. reduced readmissions) [14–19]. However, the significant heterogeneity in study methodology makes the interpretation of these data challenging. These difficulties are compounded by a lack of transparency, which makes interventions hard to reproduce [20,21]. Further, many are either limited to a small region, single site, or even an individual workstream within a hospital (e.g. emergency care) [11,13].

### 1.2 Resource availability may influence mortality and national trends may exacerbate these associations

NHS statistics demonstrate an increasing demand for its services over the last decade, both for emergency and elective care. There is a concern that has and will negatively impact on health outcomes, including mortality. Measures of resource strain are correlated with poorer outcomes [22]. However, determining the contribution of any one factor is challenging, given the complex and diverse factors which affect population-based health outcomes. Addressing this question may be achieved by correlating how metrics of strain and outcomes vary between hospital trusts.

**1.2.1 Accident & emergency care.** From 2011 to 2019, the volume of patients attending A&E across English NHS trusts increased by almost 30%. The largest factor was a significant rise in non-urgent attendances (rising 114%). Overwhelmed resources result in long waits and overcrowding within departments. Both of these phenomena have been associated with an

increase in patient mortality, length of stay, and the delayed treatment of life-threatening medical conditions including pneumonia and myocardial infarction [23–32]. Addressing this, the implementation of waiting time targets in Australia and New Zealand reduced overcrowding, and increased the efficiency of care delivery [33–35]. England's own four-hour target (FHT) was introduced in 2004 to address historical failings in A&E outcomes. However, its potential benefits have been poorly studied.

The strain on A&E departments from rising attendances is exemplified by a persistently deteriorating FHT performance [36]. The 95% target for assessing and treating patients has not been met in major A&Es since Q1 2012. From 2011 to 2019, the time taken to see 95% of all patients has increased by over a third. This suggests that the maximum wait of some A&E patients has risen substantially. With a similar trend, the number of patients admitted to hospital has increased by nearly a quarter. However, the number of acute hospital beds for them to occupy has decreased. Thus, the number of admissions per bed has been exaggerated.

**1.2.2 Bed occupancy and length of stay.** A greater hospital bed occupancy is linearly associated with a higher rate of adverse patient events (e.g. hospital-acquired infections) [37–40] and mortality [23,41–44]. These effects appear particularly pronounced above an occupancy of 90%. Whilst the quality of the current literature on this topic is limited (for example, no prospective controlled studies have been conducted), the association between the highest bed occupancies and adverse events has been reproducibly demonstrated. The U.K. National Audit Office has thus recommended hospitals should aim for a target of under 85% [45]. Despite this, the average bed occupancy has increased by 2.6%, to 90.6% in 2019.

Length of stay (LOS) has an uncertain relationship with mortality [46–49]. If one exists, it is likely to be weak and plagued by endogeneity. There are conceivable reasons why both an inappropriately short LOS, and an inappropriately long LOS could negatively impact outcomes. For example, respectively due to inadequate treatment and a subsequent need for readmission, or hospital-acquired infection [47].

**1.2.3 Intensive care.** Intensive Care Units (ICU) provide supportive care for those most critically unwell, though with exceptionally high resource requirements has a limited capacity. Approximately 2% of acute hospital admissions require intensive care [50]. Unsurprisingly, these patients have the highest mortality risk. Like general bed capacity, there is a significant national variation in Trusts' ICU capacity. This is not necessarily correlated to the number of patient admissions. Value-judgements must be made by intensivists regarding who may benefit from this finite resource [51–53]. A patient is more likely to be admitted to an ICU with greater bed availability [53]. Further, a recent U.K. study demonstrated a decreased ICU bed capacity corresponded with a significantly increased hospital mortality, an association which was most evident for the sickest patients [7,8,54]. Over the last decade, while the average ICU bed occupancy has slightly decreased, there has been an increase in the number of ICU beds. Together, this represents an 8% increase in the number of patients receiving ICU based care.

**1.2.4 Staffing.** Greater staffing by both doctors and nurses has been associated with better outcomes for patients, including reduced hospital mortality and length of stay [1,55–59]. Along with a general association, this has been particularly demonstrated within the ICU context [7,54,60–62]. While NHS staffing numbers have increased over the last decade, the U.K. remains well below the Organisation for Economic Co-operation and Development (OECD) average for both the number of doctors and nurses per head of population [63].

### 1.3 Strain may not be felt equally

The literature suggests that the strain on healthcare services has increased over the last decade. However, the capacity for different Trusts to address this challenge will vary. These include

disparities in the resources available, including both financial and physical assets (for example, ICU beds, radiology scanners and laboratory capacity), along with their workforce [64]. The COVID-19 pandemic has brought to the forefront such concerns, with fewer doctors, nurses, general medical beds, and ICU capacity, all being associated with increased mortality [44,65,66]. Prior to this, implementation of a ‘7-day services’ policy, which aimed to increase hospital resources at the weekend, has been associated with improvements in care quality process metrics, and fewer clinical errors [67]. Those with the least capability, may have borne the excess strain within the health system asymmetrically. This may have had a negative impact on patient outcomes [68].

With this context, it is hypothesised that if associations exist between systems-based resource factors and the variation in mortality between Trusts, these will have strengthened over time. In order to address this, and hence the research question of this study, potential predictors of the variation in mortality between Trusts needed to be identified.

## 1.4 Predictors of mortality variance

Highlighting the interrelatedness of system-factors which may influence patient outcomes, studies have demonstrated how poor patient flow at discharge results in a higher bed occupancy—and these are associated with a worse FHT performance and higher inpatient mortality [42,69,70]. Further, such associations are dynamic: if flow measures improve, these associations diminish [71]. This demonstrates the challenge in finding predictors which are independent of one another, and also the importance of a multivariable approach in linear regression.

A substantial quantity of high-quality hospital and Trust-level activity data is now published by the NHS, including the Summary Hospital-level Mortality Indicator (SHMI), a standardised metric of hospital mortality [72]. Potential predictors of SHMI selected for inclusion into univariate and multivariable linear regression analyses. These were identified with consideration of the wider literature, along with the aforementioned resource factors [1,49,71,73].

Although this approach will be unable to establish causation, any correlations between the predictors and SHMI can be important indicators for further examination. These will be useful for both trusts and policymakers alike. For the former, whether they are outliers in terms of a given systems-based factor, as this may influence their outcomes. For the latter, helping to inform standard setting for systems-based resources.

After further investigation to establish causality, such predictors could be incorporated into a predictive risk model of mortality. Models are useful for policymakers and clinicians alike, as a means of synthesising, quantifying and then benchmarking healthcare performance [74]. Current statistical surveillance tools have flaws, including a lack of transparency and an arbitrary design [75–79]. Particularly, the Care Quality Commission (CQC) tool, ‘Intelligent Monitoring’, has been shown poorly predictive of both qualitative and quantitative outcomes [80,81]. This study may serve to benefit an iteration in the current provision.

## 2. Methods

### 2.1 Data collation

Data from English NHS trusts were accessed from open datasets hosted on the NHS Statistics and NHS Digital websites [72,82]. Complete data were available from quarter 1, 2011. The onset of the coronavirus pandemic and its subsequent impact on healthcare data confounded the use of data after quarter 2, 2020. Thus, the analysis was limited to the full years 2011 to 2019. The following statistical reports were collated: “Emergency Department attendances & emergency admissions”; “Hospital Episode Statistics”; “NHS workforce statistics”; “Hospital activity statistics”; “Critical Care bed capacity”; “Bed availability and occupancy”; “Summary

Hospital-Level Mortality Indicator (SHMI)”. Full definitions and submission guidelines for each indicator are available from the aforementioned sources. Each NHS trust takes responsibility for the routine reporting of its activity, which is then published centrally.

## 2.2 Data filtering

Collated data were filtered in order to only capture acute emergency adult hospital admissions, which represent the vast majority of in-hospital deaths. Thus, trusts were excluded if they did not accept urgent (type 1) A&E patients or have critical care facilities. Likewise, non-NHS providers, NHS specialist trusts (including hospital admissions to maternity, paediatric, mental health and learning disability beds), walk-in or treatment centres and community providers were all excluded. To avoid comparing significantly different trusts in terms of activity, trusts were excluded if they admitted under 1000 patients per year. Finally, trusts reporting less than 50% of variables within a statistic report were excluded for that year. These were often at the dissolution or formation of new trusts over the decade.

## 2.3 Variables

The included variables were either absolute values or a ratios derived from data covering the same time-period, at the same Trust (e.g. ICU beds per admission). For standardisation, all variables were created by aggregating quarterly data into yearly averages, unless they were already in this format. A trusts SHMI was used as the outcome (dependent) variable with which to assess the variation in intra-hospital mortality. Predictor (independent) variables were compared against the variance in SHMI, having been identified from the collated statistical reports. The rationale for those selected described is described within S1 Appendix 1 in [S1 File](#). Of note, previous studies have shown LOS to be non-normally distributed [46,48], yet the available data only permitted the use of the mean LOS. Despite its distribution, some authors advocate for the use of the mean irrespective as it would account for the resource burden prolonged admissions represent [83].

SHMI is a standardised measure of hospital mortality. It is the ratio of the actual deaths following a hospital admission and the expected deaths given the clinical casemix and characteristics of the patient population [82]. A score is assigned between 0 and 2, with the English average standardised to a score of 1.000 [84]. A SHMI under 1 indicates fewer deaths were observed than expected, while to opposite true for an SHMI over 1. Given that demographics are included within SHMI, these were not considered as potential predictors. Despite potential flaws, it is the only nationally available government statistic of hospital mortality variance [1,85–87].

## 2.4 Timepoints

The data from three equally space years across the 2011–2019 reference period were selected on which to perform cross-sectional regression analyses. This approach was taken to provide a representative sample, helping to limit the effect of any confounding regional or national phenomena. It equally reduces the statistical concerns of multiple testing and is consistent with the resources available to conduct the study.

## 2.5 Bias

NHS reorganisation over the decade, largely through mergers, resulted in a diminishing number of trusts included within each analysis. In order to account for this potential bias, the analysis was repeated to only including those trusts common to all three analysis years. This meant

for 2019, 2015 and 2011, that 4.9%, 12.0% and 15.2% of trusts were excluded from the Robustness test, respectively. Across each analysis year SHMI was the most frequently missing data-point, but for no more than for 5% of trusts in each analysis year. All other variables were missing for no more than 2.5% of trusts.

## 2.6 Statistics

Descriptive statistics were used to report the change in absolute values overtime. Histograms' bin sizes were determined to provide an approximately equal distribution (appendices 2 & 4). These were then kept consistent across all years of comparison.

For the univariate analysis (UVA), ordinary least squares linear regression was conducted using SHMI as the dependent (outcome) variable, against each of the independent (predictor) variables. A series of cross-sectional regression analyses were performed for each year separately. Results are presented for each analysis with the statistical significance value (judged as  $p = <0.05$ ), regression coefficients and the coefficient of determination (R-squared ( $R^2$ )). The statistical principles of inclusivity and simplicity were balanced. Thus, statistical significance within the UVA did not automatically exclude the predictor from the multivariable analysis (MVA). However, if the variables continued to add little strength to the model they would be removed, and a reanalysis undertaken.

Assumption testing and robustness analyses were conducted in order to ensure the internal validity of the MVA (S1 Appendix 2 in [S1 File](#)). The data were assessed for multicollinearity, independence of the residuals, linearity, homoscedasticity and normality. Anomalies are reported in the results section. Outlying trusts, identified using Cook's distance, central leverage values and Mahalanobis distance, were excluded and the MVA repeated.

The analysis conducted for this paper was completed using Microsoft Excel (v.17, 2019), IBM SPSS Statistics (v.26) and Stata (v.17).

## 3. Results

Over the 2011 to 2019 analysis period, the number of acute hospital trusts with A&E departments fell from 149 to 133. The majority of these were mergers of a number of small Trusts into a much larger one. Missing data further reduced the included trusts, such that only 138, 133 and 123 trusts for 2011, 2015 and 2019, respectively, were included in the regression analysis ([Table 1](#)). The number of trusts common to all three years, and those on which the robustness analysis was completed, was 117.

### 3.1 Descriptive analysis

[Table 1](#) quantifies the change in each variable between 2011 and 2019, mirroring the national trends described previously. While bed occupancy and the number of doctors and nurses increased, the FHATB performance and ICU beds per 10,000 admissions ('ICU beds') decreased. Notably, there was a marked increase in the interquartile range of the FHATB (four-fold).

Each variable was assessed visually (S1 Appendix 4 in [S1 File](#)). As the dependent variable (SHMI) is not significantly skewed or kurtotic there is no indication to perform non-linear regression.

### 3.2 Univariate analyses

[Table 2](#) shows the result of the ULR analyses of each predictor using SHMI as the dependent variable, for the years 2019, 2015 and 2011.

Table 1. Descriptive statistics of the independent and dependent variable(s), correct to 3 significant figures.

|                                |                 | 2011                | 2015                | 2019              |
|--------------------------------|-----------------|---------------------|---------------------|-------------------|
| n                              |                 | 138                 | 133                 | 123               |
| SHMI                           | Mean (Std. Dev) | 1.00 (0.098)        | 1.00 (0.090)        | 1.00 (0.101)      |
|                                | Median (Q1-Q3)  | 1.02 (0.944–1.06)   | 1.00 (0.960–1.07)   | 1.01 (0.958–1.07) |
|                                | Min-Max         | 0.71–1.25           | 0.68–1.18           | 0.69–1.20         |
| Bed Occupancy                  | Mean (Std. Dev) | 87.5 (5.29)         | 89.3 (5.00)         | 90.2 (4.27)       |
|                                | Median (Q1-Q3)  | 87.9 (84.6–91.4)    | 89.6 (85.9–92.9)    | 90.7 (87.6–93.0)  |
|                                | Min-Max         | 62.7–96.9           | 69.2–99.0           | 77.9–98.0         |
| FHATB                          | Mean (Std. Dev) | 96.7 (4.28)         | 90.5 (8.22)         | 81.7 (12.1)       |
|                                | Median (Q1-Q3)  | 98.0 (95.6–99.6)    | 92.5 (85.8–96.6)    | 83.7 (73.8–90.6)  |
|                                | Min-Max         | 68.1–100            | 55.3–100            | 41.8–100 (58.2)   |
| ICU beds per 10,000 admissions | Mean (Std. Dev) | 6.96 (5.36)         | 6.51 (4.55)         | 5.69 (4.22)       |
|                                | Median (Q1-Q3)  | 5.33 (3.89–7.98)    | 4.72 (3.60–8.20)    | 4.01 (3.33–6.08)  |
|                                | Min-Max         | 2.20–35.5           | 2.77–31.7           | 2.15–28.57        |
| Doctors per bed                | Mean (Std. Dev) | 0.827 (0.223)       | 0.896 (0.235)       | 1.03 (0.281)      |
|                                | Median (Q1-Q3)  | 0.771 (0.691–0.899) | 0.830 (0.740–0.995) | 0.95 (0.830–1.16) |
|                                | Min-Max         | 0.445–1.91          | 0.560–1.71          | 0.590–2.05        |
| Nurses per bed                 | Mean (Std. Dev) | 1.76 (0.434)        | 2.01 (0.511)        | 2.17 (0.544)      |
|                                | Median (Q1-Q3)  | 1.63 (1.48–1.91)    | 1.87 (1.66–2.28)    | 2.01 (1.75–2.42)  |
|                                | Min-Max         | 1.03–3.58 (2.55)    | 1.32–4.68 (3.36)    | 1.48–4.34 (2.86)  |
| Mean LOS                       | Mean (Std. Dev) | 4.23 (0.583)        | 4.20 (0.600)        | 4.02 (0.605)      |
|                                | Median (Q1-Q3)  | 4.20 (3.80–4.50)    | 4.17 (3.75–4.49)    | 3.97 (3.65–4.29)  |
|                                | Min-Max         | 3.00–6.20           | 2.85–6.11           | 2.67–6.07         |

Bed occupancy and the four-hour admit to bed are presented as percentages. Mean length of stay (LOS) in days. Doctors and nurses (headcount of staff members of that group) per bed. SHMI as the derived standardised figure as previously described. SHMI: Standardised Hospital Mortality Indicator, FHATB: Four Hour admit to bed, ICU: Intensive Care Unit.

<https://doi.org/10.1371/journal.pone.0303932.t001>

For 2019 and 2015, all apart from the mean LOS were statistically significant. In 2011, SHMI's association with bed occupancy and the FHATB lacked significance. This may reflect a rise in bed occupancy and deterioration in FHATB performance observed over time (Table 1).

The greatest  $R^2$  magnitude was with the number of doctors per bed. Each variables' association with SHMI is largely consistent over time, although notably the FHATB and bed occupancy display an increasing trend. Over 2011 to 2019, this was four-fold and three-fold, respectively, albeit of a comparatively low magnitude throughout. Nurses per bed appeared to have an anomalously low association in 2015.

The UVA predicts that an additional 1 doctor per bed would be associated with a fall in SHMI of 0.257. In terms of their trends, the unstandardised coefficient size of doctors, nurses and the mean LOS remain stable over time. In contrast, the size of the ICU beds and FHATB coefficients increase over time, and therefore these predictors are associated with an increasingly negative effect on the SHMI (Table 2).

The standardised coefficients displayed in Fig 1 follow a similar trend with the largest effect on SHMI by doctors per bed, followed by ICU beds, and then nurses per bed. Mean LOS has the least effect. This pattern is identical for 2015, and similar for 2011. For 2011, the exceptions compared to the other years are that nurses per bed have a greater effect size than ICU beds, and the FHATB has almost no effect at all. The positive or negative influence on SHMI by an individual predictor remain consistent across all three years.

**Table 2. The results of the univariate analyses comparing the independent (predictor) variables to the dependent variable (SHMI: Standardised Hospital Mortality Indicator).ICU: Intensive Care Unit, Unstd.**

|                                 |                        | 2011                  | 2015                 | 2019               |
|---------------------------------|------------------------|-----------------------|----------------------|--------------------|
| <b>Four-hour admit to bed</b>   | Unstd. Reg. Coeff.     | -0.000489             | -0.00191             | -0.002             |
|                                 | (95% CIs)              | (-0.00437 to 0.00339) | (-0.004 to -0.00005) | (-0.004 to -0.001) |
|                                 | Significance (p-value) | 0.804                 | 0.044                | 0.002              |
|                                 | R <sup>2</sup>         | 0.000                 | 3.0%                 | 7.3%               |
| <b>Bed occupancy</b>            | Unstd. Reg. Coeff.     | 0.003                 | 0.003                | 0.006              |
|                                 | (95% CIs)              | (0.000 to 0.006)      | (0.000 to 0.006)     | (0.002 to 0.010)   |
|                                 | Significance (p-value) | 0.037                 | 0.032                | 0.004              |
|                                 | R <sup>2</sup>         | 3.2%                  | 3.4%                 | 6.8%               |
| <b>ICU beds per 10,000 adm.</b> | Unstd. Reg. Coeff.     | -0.007                | -0.006               | -0.010             |
|                                 | (95% CIs)              | (-0.010 to -0.004)    | (-0.010 to -0.003)   | (-0.014 to -0.006) |
|                                 | Significance (p-value) | <0.001                | <0.001               | <0.001             |
|                                 | R <sup>2</sup>         | 14.1%                 | 10.4%                | 16.5%              |
| <b>Doctors per bed</b>          | Unstd. Reg. Coeff.     | -0.257                | -0.213               | -0.204             |
|                                 | (95% CIs)              | (-0.317 to -0.196)    | (-0.268 to -0.158)   | (-0.257 to -0.150) |
|                                 | Significance (p-value) | <0.001                | <0.001               | <0.001             |
|                                 | R <sup>2</sup>         | 34.2%                 | 30.6%                | 32.1%              |
| <b>Nurses per bed</b>           | Unstd. Reg. Coeff.     | -0.093                | -0.046               | -0.062             |
|                                 | (95% CIs)              | (-0.128 to -0.058)    | (-0.076 to -0.017)   | (-0.093 to -0.030) |
|                                 | Significance (p-value) | <0.001                | 0.002                | <0.001             |
|                                 | R <sup>2</sup>         | 17.0%                 | 6.9%                 | 11.0%              |
| <b>Mean length of stay</b>      | Unstd. Reg. Coeff.     | 0.026                 | 0.016                | 0.027              |
|                                 | (95% CIs)              | (-0.002 to 0.054)     | (-0.010 to 0.042)    | (-0.002 to 0.057)  |
|                                 | Significance (p-value) | 0.071                 | 0.229                | 0.070              |
|                                 | R <sup>2</sup>         | 2.4%                  | 1.1%                 | 2.7%               |

Reg. Coeff.: Unstandardised regression coefficient, CI: Confidence interval.

<https://doi.org/10.1371/journal.pone.0303932.t002>

### 3.3 Multivariable analyses

As described, two sequential MVA were undertaken. Firstly, to include all UVA predictors in the model (S1 Appendix 5 in [S1 File](#)), and secondly to exclude those which were not consistently statistically significant on UVA (i.e. mean LOS) ([Table 3](#)). Thus, 6 or 5 predictors were used in each MVA (termed ‘6P’ and ‘5P’), respectively.

The number of doctors and bed occupancy demonstrated statistical significance in each year, with negative and positive associations with SHMI, respectively. The FHATB and nurses were only significant in 2019. ICU beds were not significant in at any timepoint, nor the mean LOS within the ‘6P’ analysis. When comparing the standardised coefficients, doctors per bed clearly represent the strongest association with SHMI variation. This is broadly consistent across all three years.

The coefficients for bed occupancy and nurses per bed are approximately stable, while ICU beds and the FHATB become increasingly negative. Comparing these two, while the change is four-fold for ICU beds, it is nearly 10-fold for the FHATB. This marked change is represented equally in the UVA and descriptive analysis. The coefficients for bed occupancy are similar within the UVA in terms of sign and size, while those for ICU beds are much reduced. However, nurses per bed change in both these regards in the MVA. While having a consistently negative sign in the UVA, it is positive within the MVA and the coefficient size increases over



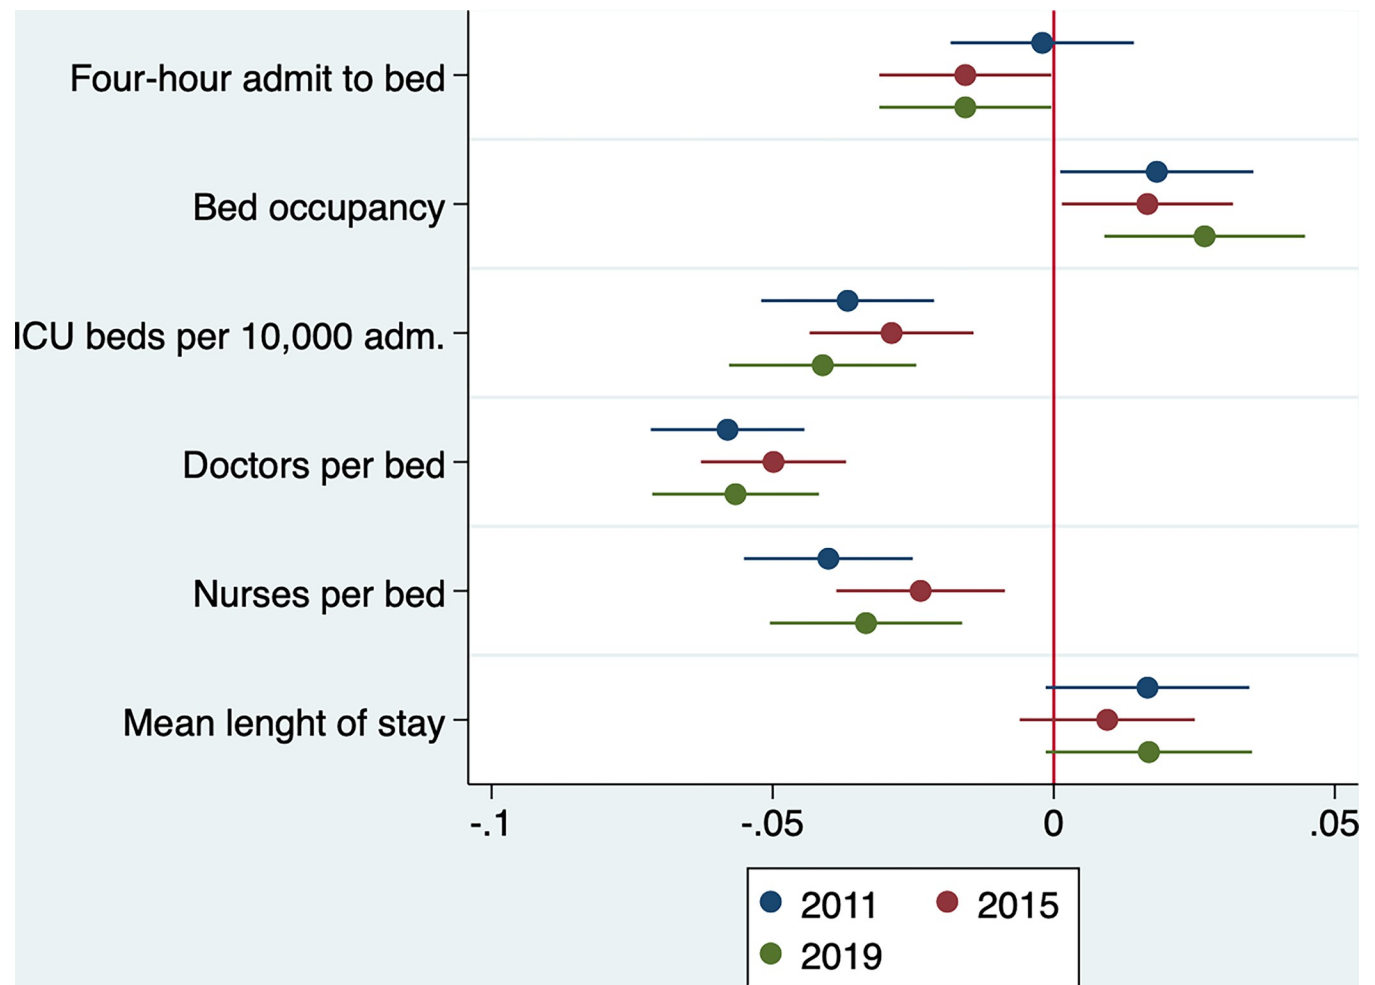

Fig 1. Comparison of standardised regression coefficients from univariate models.

<https://doi.org/10.1371/journal.pone.0303932.g001>

time (MVA average 0.0315 vs. UVA -0.0663) although the variable is only statistically significant in 2019.

The variation in SHMI explained by the chosen predictors is approximately 36%. The  $R^2$  value of each model is broadly consistent both between years and methodologies ('6P' vs. '5P'), with a slightly increasing trend over time. The strengthening associations in the FHAB and ICU beds may reflect the concurrent rise in the  $R^2$ . The removal of the mean LOS from the MVA has little effect on the  $R^2$  value. However, a marginal increase in the magnitude of nearly all the predictors' coefficients is observed.

### 3.4 Robustness testing

In order to ensure demographic variables were adequately controlled for within the SHMI algorithm, these variables (including age and gender) were individually analysed by univariate regression, and then sequentially included within the 6P MVA. In no circumstance were the variables statistically significant in regression, nor did they change the adjusted R-squared significantly (results not shown).

To discount the effect of outliers (identified using the methods described above), the MVA was repeated with these trusts excluded (S1 Appendix 6 in [S1 File](#)). For each year, the

**Table 3. The results of the 5-independent predictor '5P' multivariable regression analysis, comparing their association with SHMI.**

|                                 |                        | 2011                  | 2015                   | 2019                    |
|---------------------------------|------------------------|-----------------------|------------------------|-------------------------|
| <b>Four-hour admit to bed</b>   | Unstd. Reg. Coeff.     | 0.000462              | -0.00134               | -0.00151                |
|                                 | (95% CIs)              | (-0.00270 to 0.00362) | (-0.00290 to 0.000216) | (-0.00276 to -0.000255) |
|                                 | Std. Reg. Coeff.       | 0.0202                | -0.122                 | -0.1805                 |
|                                 | Significance (p-value) | 0.773                 | 0.091                  | 0.019                   |
| <b>Bed occupancy</b>            | Unstd. Reg. Coeff.     | 0.00379               | 0.00291                | 0.00452                 |
|                                 | (95% CIs)              | (0.00124 to 0.00635)  | (0.000354 to 0.00546)  | (0.000897 to 0.00814)   |
|                                 | Std. Reg. Coeff.       | 0.205                 | 0.163                  | 0.190                   |
|                                 | Significance (p-value) | 0.004                 | 0.026                  | 0.015                   |
| <b>ICU beds per 10,000 adm.</b> | Unstd. Reg. Coeff.     | -0.000422             | -0.000886              | -0.00222                |
|                                 | (95% CIs)              | (-0.00362 to 0.00277) | (-0.00352 to 0.00335)  | (-0.00667 to 0.00222)   |
|                                 | Std. Reg. Coeff.       | -0.0230               | -0.00445               | -0.0926                 |
|                                 | Significance (p-value) | 0.794                 | 0.959                  | 0.324                   |
| <b>Doctors per bed</b>          | Unstd. Reg. Coeff.     | -0.304                | -0.227                 | -0.231                  |
|                                 | (95% CIs)              | (-0.409 to -0.200)    | (-0.301 to -0.153)     | (-0.317 to -0.146)      |
|                                 | Std. Reg. Coeff.       | -0.693                | -0.590                 | -0.644                  |
|                                 | Significance (p-value) | <0.001                | <0.001                 | <0.001                  |
| <b>Nurses per bed</b>           | Unstd. Reg. Coeff.     | 0.0335                | 0.0157                 | 0.0453                  |
|                                 | (95% CIs)              | (-0.0164 to 0.0834)   | (-0.0145 to 0.0459)    | (0.00676 to 0.0838)     |
|                                 | Std. Reg. Coeff.       | 0.148                 | 0.0887                 | 0.243                   |
|                                 | Significance (p-value) | 0.187                 | 0.306                  | 0.022                   |
| <b>R<sup>2</sup></b>            |                        | 38.9%                 | 35.6%                  | 42%                     |
| <b>Model sig. (p-value)</b>     |                        | <0.001                | <0.001                 | <0.001                  |

Unstd. Reg. Coeff.: Unstandardised regression coefficients. Std. Reg. Coeff: Standardised regression coefficient Sig.: Significance.

<https://doi.org/10.1371/journal.pone.0303932.t003>

R<sup>2</sup> is somewhat reduced but those predictors which were statistically significant remained the same, and equally the standardised coefficients are similar. Therefore, it appears that the presence of these concerning outlying entries did not have an egregious effect on the results of the MVA.

Secondly, it is possible that the changing composition of hospital trusts over time could have affected the observations of the analysis. To exclude this, the MVA was repeated on only the 117 common to all three years (S1 Appendix 7 in [S1 File](#)). Again, these results are broadly consistent with our original analyses, although for 2015 the FHATB and bed occupancy gain and loose statistical significance, respectively. The R<sup>2</sup> increases in the common set MVA for each year, and particularly so for 2011. This could be accounted for by an increase in the effect size of doctors per bed. While small, this predictor has the greatest size and thus the marginal effect may be exaggerated compared to others.

These data would suggest that the associations observed within the MVA were not affected by the changing composition of trusts, nor those which are statistical outliers. Indeed, some element of the associations may have been masked.

## 4. Discussion

### 4.1 Summary of findings

Over three sequential cross-sectional retrospective analyses, the 5 predictors within the MVA were able to reproducibly predict approximately 36% of the variation in SHMI between hospital trusts. While this leaves 64% in variance unaccounted for, the model performs well

comparative to similar studies within the literature [71]. Speculatively, remaining factors may be found within the macro-healthcare environment, such as efforts to centralise services, or the availability of ambulance and social care services. Equally, this unexplained variance could be due to individual hospital factors, like the skill, morale and leadership of staff, or the availability of unmeasured resources within our model (e.g. radiology, theatre space). The number of doctors per bed was most robustly and consistently associated with SHMI, with the bed occupancy secondary to this. The FHAB metric became more strongly associated with SHMI over time. While ICU beds per 10,000 admissions and nurses per bed were significantly associated with SHMI on UVA, this was not the case when included within the MVA. Inclusion of the mean LOS did not benefit the model, and thus was excluded. Assumption testing of the MVA, and the robustness analyses support the internal validity of these findings. Sole inclusion of the trusts common to all three years strengthens the overall association between the predictors and SHMI. The average  $R^2$  increased from 36% to 0.39%. It is possible that during the reorganisation of trusts there is an exaggerated oversight and surplus of resources, such that a degree of the association of the predictors and SHMI is masked.

## 4.2 Doctors per bed

Doctors have a critical role in healthcare delivery, from diagnosis to clinical intervention. Hence, that the number of doctors determine the greatest variation in SHMI seems plausible. Jarman *et al.*, utilising similar methodology, equally showed that the number of doctors per bed was the best predictor of an excess standardised hospital mortality for emergency admissions. They found that a 1% increase in the number of hospital doctors per bed was associated with a 0.119% decrease in hospital standardised mortality (equating to 333 more doctors and 186 less deaths). The impact on doctor staffing and negative patient outcomes, including mortality, has been linked by other studies within the literature [56,88–90].

The NHS may have an exaggerated vulnerability to a natural variation in doctor numbers between hospitals, given their comparative scarcity compared to other westernised healthcare systems. Aside from Poland, the U.K. has the lowest number of doctors per population in the European. Compared to the E.U. average (3.7), OECD average (3.5), and other western European countries such as Germany (4.25), Spain (4.6) and Norway (5.2), the U.K. lags significantly behind at 2.81 doctors per 1000 inhabitants [63].

The increase in total doctors nationally (Table 1) by around 20%, may have offset other factors which have potentially strained patient care over the decade. For example, patient acuity has also risen over time and heavy clinical workloads are an important determinant of unsafe care [91,92]. Related with this, patient throughput per bed has increased with admissions having risen yet hospital beds and the average lengths of stay have diminished. Broadly, between UVA and MVA, as well as the robustness analyses, the coefficients remain of a similar sign and size. It is possible the increase in doctors over time helped equalise the differences in doctor numbers between trusts, which may account for the slightly higher coefficient in 2011. Finally, the effect of the 2015 junior doctors contract dispute on the slightly lower coefficient in 2015 is uncertain. One possibility is that as consultants adopted a more 'hands-on' role, this may have actually represented an excess of doctors, given the number of consultants has risen significantly more than non-consultant (junior) doctors.

Given its average correlation with nurses per bed ( $-r = 0.692$ , S1 Appendix 8 in S1 File), the interpretation of this predictor's coefficients must be approached with caution. Distinguishing their relative effect on the variation of SHMI is challenging and requires further investigation. This limitation will be discussed in more detail further into the discussion.

### 4.3 Bed occupancy

An increasingly high bed occupancy is associated with worse outcomes. This effect is especially pronounced above 90% [23,37–44], which became the national median in 2016. As hospital beds have become fuller nationally, the interquartile range of this metric has narrowed. The metric has come to be more normally distributed and significantly less skewed and kurtotic. This may have benefited the metric remaining to be a good discriminator of mortality performance.

Consistent with the hypothesis that bed occupancy is associated with worse outcomes, a positive predictive relationship is observed between the coefficient and SHMI. Over time its effect size remains of a similar magnitude and is consistently statistically significant. These observations are mirrored within the UVA. However, comparatively its effect size is roughly a third of doctors per bed. Just like doctors, the U.K. has a comparatively low number of hospital beds, having the second lowest compared to E.U. countries. For example, while Germany has 7.9 beds per 1000 population, the U.K. has 2.4 (the OECD average is 4.7) [63].

### 4.4 The four-hour admission to bed (FHATB)

It is well established that patient crowding within A&E negatively effects outcomes for patients requiring admission [23,25–27], and especially so for those critically unwell [93–97]. Thus, it would be expected that a worse FHATB performance would be reflected in excess mortality. Our findings support this hypothesis.

Nationally, the average FHATB performance has significantly worsened over the decade (Table 1). During this period, the metric became increasingly normally distributed and, by 2019, a statistically significant predictor of SHMI with an increasingly negative coefficient (with an effect size matching bed occupancy). Within the common set analysis, the coefficient sizes are larger and the metric is also statistically significant in 2015. One possibility is that any reorganisation of trusts increases the resources and oversight on A&E performance. Thus, newly created trusts mask the true association between FHATB and SHMI.

On UVA the FHATB coefficient is greater than the MVA in 2015 and 2019, suggesting that other predictors were accounting of some of the effect size. Although bed occupancy is on average relatively poorly correlated with the FHATB ( $r = \sim 0.211$ , S1 Appendix 8 in S1 File), having more available beds should ostensibly assist A&E flow. Keogh *et al.* demonstrated a statistically significant relationship between a lower bed occupancy and FHT performance [71]. However, the association between flow variables and the FHT performance was weak ( $R^2 \sim 0.15$ ). While not specifically addressed, given the hypothetical benefits of the FHATB over the FHT, future models should consider its inclusion as an important metric of hospital performance.

### 4.5 ICU beds per 10,000 admissions

Intensive care treats those patients whom are most sick within the hospital. It has previously been shown within the literature that ICU bed availability can impact patient outcomes, including mortality [7,8,54]. Our data supports this, showing that fewer ICU beds adversely affects mortality. As ICU beds have diminished nationally (a 33% median fall nationally, 2011–'19), the strength of this relationship has increased. However, it remains small compared to the other predictors. ICU beds are strong and statistically significant determinant of SHMI on UVA, however it lacks both these qualities in MVA. Other predictors may thus explain the variation. Second to doctors and nurses, ICU beds are correlated to both these two predictors (S1 Appendix 3 in S1 File). It seems plausible that a well-staffed hospital overall is also reflected in its ICU. It has been demonstrated that better staffing in ICU of physicians and nurses are

associated with reduced mortality and LOS, both within ICU and hospital-wide [54,55,60]. Accordingly, the effect of the staffing variables on SHMI may be exaggerating the strength of the association between ICU beds and SHMI on UVA. A further analysis may consider addressing these concerns by removing or substituting this predictor, for example, with ICU bed occupancy, or specific ICU staffing rates. Finally, the extensively skewed and leptokurtic distribution may hinder the ability for this metric to be a discriminator of SHMI performance (S1 Appendix 4 in [S1 File](#)). However, if ICU bed resources decreased further, the relationship between ICU beds and SHMI may strengthen.

#### 4.6 Nurses per bed

Like doctors, the number of nurses per bed has increased over time ([Table 1](#)). However, in 2017, the Royal College of Nurses released a report stating that over half of their survey respondents reported a shortfall in planned staff per shift, and that patient care was compromised because of it [98]. These sentiments are reflected in low overall OECD-reported nursing figures per population, relative to northern European comparator countries [63].

While on UVA, nurses per bed is negatively associated with SHMI and is statistically significant, the opposite is true within the MVA. Counterintuitively, this would suggest that more nurses per bed are associated with excess observed deaths. Despite outliers being excluded, this pattern persists.

This result lacks external validity, given the unlikelihood that an excess of nurses are resulting worse patient outcomes. It is likely the predictor is markedly non-independent of one or more of the others, causing multicollinearity. The doctors per bed metric is most likely at fault, as their correlation is the highest between all the predictors (described in S1 Appendix 2 in [S1 File](#), assumption #3). It is higher than the original dataset prior to data filtering. A hospital endowed with doctors is also likely to be with nurses, and this is potentially truer of acute hospital trusts. The pattern of 2011 and 2019 having the highest positive coefficient, matches the two years when the correlation with doctors is also highest. Secondly, the numbers of nurses and ICU beds are also modestly correlated ( $r = \sim 0.6$ ), likely given the mandated minimum staffing per patient in ICU [99]. Hence, these predictors may also demonstrate a degree of non-independence.

An additional factor may be that the reported number of nurses are a poor representation of those which are patient facing and are likely to influence patient outcomes. For example, there are a much greater diversity of nursing roles, with many not involved in acute care (e.g. day surgery). Thus, the nursing number's influence on SHMI may be obscured. While there is a broad literature associating diminished nursing staffing and worse patient outcomes [54,56–61,100–102], few studies rigorously control for the effects of other hospital resource factors (e.g. doctor or bed numbers). Future research is required to disentangle their respective effects on patient outcomes. Finally, a high nurse to patient ratio may indicate a sicker patient population which could further help explain this finding.

#### 4.7 Strengths and weaknesses of the study

We believe this study first to examine the relationship between the inter-trust variance in SHMI and systems-level metrics of hospital resource. Furthermore, it elucidates how these relationships have changed (or remained stable) over time. The use of publicly available data helps ensure the relevance and transparency of the analysis. While the explanatory power of the analysis is modest (An MVA  $R^2$  of  $\sim 0.36$ ), it remains stable over time and is commensurate to similar studies. It is plausible the addition of novel variables may improve the model.

The SHMI, the outcome variable used in this study, has been subject to criticism due to its methodology for case mix adjustment [103] and its relevance as a summary performance measure has been questioned [104]. A literature review examining the relationship between various process measures of care and risk-adjusted mortality in general (not the SHMI specifically) found positive associations in 26 out of 51 cases [103]. At a methodological level, except for the three year time frame and case mix adjustment, the SHMI does not explicitly address sampling variability. The SHMI specifically was not found to be associated with avoidable deaths identified on the basis of retrospective case reviews [105], while more recent studies have demonstrated associations between SHMI and components of the British General Medical Council's junior doctor satisfaction survey [106] and staff-, (but not patient) -satisfaction as expressed in a survey known as the Friends and Family Test [107]. Indeed, the SHMI continues to be published and presented by NHS England as a tool for hospitals, regulators and commissioners to compare and investigate mortality outcomes [108]. Although we fully acknowledge the limitations of the SHMI as a summary indicator of hospital quality, we therefore still feel it has merit as an indicator of one important dimension of hospital quality, and invite other researchers to extend our analysis to other performance measures.

Like all macro analyses of healthcare data, there are inherent limitations in our study. Firstly, relevant data may have been excluded when the datasets were filtered. Trusts with greater resource constraints may be predisposed to submit incomplete data, which may bias the dataset on which the analyses were completed. Equally, poor data quality or 'gaming' may both mask and/or exacerbate the relationships identified [71,109]. A limited data quality may limit the reported associations. However, given these data are verified and published by government the study has assumed their veracity. More generally, the 2012 Health and Social Care Act and 2015 junior doctors' contract dispute may have confounded the relationships observed. It is important to note that the analysis was conducted at trust-level, and thus the associations uncovered are not necessarily found at the individual level.

The analyses was only conducted in three representative years over the analysis period (beginning, middle and end). This was done to limit the multiplicity of comparisons and resource constraints. However, the analysis of additional years of data may have revealed different trends in the data. The temporal scope of the study was limited as robust datasets were not available for all predictors prior to 2011, and limited past 2019 due to the coronavirus pandemic. Floor and ceiling effects of the included variables cannot be discounted; especially regarding bed occupancy and the FHATB where the metrics have approached or reached 100%. Non-linear relationships between mortality variance and these predictors have not been thoroughly investigated, which may lead to threshold effects (i.e. only over/below a certain value is mortality affected in any way). Some predictors may be limited in their discriminatory ability due to the limited distribution of results (e.g. FHATB, ICU beds). As has been previously commented, as with any complex system, ostensibly independent variables may have some degree of overlapping effect. Finally, there is an unclear relation between statistical significance and clinical relevance. An important caveat when interpreting our findings is that our study was not designed to establish causality. Although we have discussed the plausibility of a causal relationship between SHMI and the independent variables, we emphasise that our study is first and foremost exploratory and further research is needed to determine whether causality can be inferred.

The analyses passes assumption testing and robustness checks, suggesting good internal validity. However, the minor drawbacks described, including a degree of non-linearity between some independent and dependent variables (S1 Appendix 2 in [S1 File](#)) may have affected the reported relationships. The pattern and size of coefficients largely remaining unchanged. Our data demonstrates the utility of such studies in demonstrating the potential

benefit of system-wide policy change. However, there is an important need for prospective and controlled trial designs to investigate the effects of systems-based factors on patient outcomes. These are especially important if attempting to justify the financial cost of policy interventions (e.g. additional hospital beds, trained doctors) in the relatively resource constrained environment of a public healthcare system [100].

#### 4.8 Policy implications and further research

Evidence-based policymaking has become established as the gold standard approach. Studies should not only produce the type and strength of evidence that is necessary to justify a change in policy, but also produce practical solutions. This study aimed to directly address these needs. For clinical leaders in healthcare, this research aims to elucidate the systems factors may be negatively impacting patient outcomes. Future research is required to establish whether associations observed represent causal relationships and how they may be included in a predictive model. Contextualising the study within local service demands may provide the fidelity to optimally substantiate service reconfiguration and undertake cost-effectiveness analyses of changes to the service.

### Supporting information

#### S1 File.

(DOCX)

### Author Contributions

**Conceptualization:** Andrew J. Gardner.

**Data curation:** Andrew J. Gardner.

**Formal analysis:** Andrew J. Gardner.

**Investigation:** Andrew J. Gardner.

**Methodology:** Søren Rud Kristensen.

**Supervision:** Søren Rud Kristensen.

**Writing – original draft:** Andrew J. Gardner.

**Writing – review & editing:** Søren Rud Kristensen.

### References

1. Jarman B, Gault S, Alves B, Hider A, Dolan S, Cook A, et al. Explaining differences in English hospital death rates using routinely collected data. *Bmj*. 1999; 318(7197):1515–20. <https://doi.org/10.1136/bmj.318.7197.1515> PMID: 10356004
2. Holt PJ, Sinha S, Ozdemir BA, Karthikesalingam A, Poloniecki JD, Thompson MM. Variations and inter-relationship in outcome from emergency admissions in England: a retrospective analysis of Hospital Episode Statistics from 2005–2010. *BMC health services research*. 2014; 14:270. <https://doi.org/10.1186/1472-6963-14-270> PMID: 24947670
3. Gallagher J. Early deaths: Regional variations 'shocking'. *BBC News*,. 2013.
4. Hospital staffing 'affects death rates'. *BBC News*,. 2015.
5. Gray WK, Navaratnam AV, Day J, Babu P, Mackinnon S, Adelaja I, et al. Variability in COVID-19 in-hospital mortality rates between national health service trusts and regions in England: A national observational study for the Getting It Right First Time Programme. *EClinicalMedicine*. 2021; 35:100859. <https://doi.org/10.1016/j.eclinm.2021.100859> PMID: 33937732

6. Docherty AB, Mulholland RH, Lone NI, Cheyne CP, De Angelis D, Diaz-Ordaz K, et al. Changes in in-hospital mortality in the first wave of COVID-19: a multicentre prospective observational cohort study using the WHO Clinical Characterisation Protocol UK. *The Lancet Respiratory medicine*. 2021; 9(7):773–85. [https://doi.org/10.1016/S2213-2600\(21\)00175-2](https://doi.org/10.1016/S2213-2600(21)00175-2) PMID: 34000238
7. Gabler NB, Ratcliffe SJ, Wagner J, Asch DA, Rubenfeld GD, Angus DC, et al. Mortality among patients admitted to strained intensive care units. *American journal of respiratory and critical care medicine*. 2013; 188(7):800–6. <https://doi.org/10.1164/rccm.201304-0622OC> PMID: 23992449
8. Wilcox ME, Harrison DA, Patel A, Rowan KM. Higher ICU Capacity Strain Is Associated With Increased Acute Mortality in Closed ICUs. *Critical care medicine*. 2020; 48(5):709–16. <https://doi.org/10.1097/CCM.0000000000004283> PMID: 32141924
9. Ferlie EB, Shortell SM. Improving the quality of health care in the United Kingdom and the United States: a framework for change. *The Milbank quarterly*. 2001; 79(2):281–315. <https://doi.org/10.1111/1468-0009.00206> PMID: 11439467
10. Faluyi OO, Connor JL, Chatterjee M, Ikin C, Wong H, Palmer DH. Advanced pancreatic adenocarcinoma outcomes with transition from devolved to centralised care in a regional Cancer Centre. *British journal of cancer*. 2017; 116(4):424–31. <https://doi.org/10.1038/bjc.2016.406> PMID: 28081546
11. Jessup R, Putrik P, Buchbinder R, Nezon J, Rischin K, Cyril S, et al. Identifying alternative models of healthcare service delivery to inform health system improvement: scoping review of systematic reviews. *BMJ open*. 2020; 10(3):e036112. <https://doi.org/10.1136/bmjopen-2019-036112> PMID: 32229525
12. Clarkson J, Dean J, Ward J, Komashie A, Bashford T. A systems approach to healthcare: from thinking to practice. *Future Healthc J* 2018; 5(3):151–5. <https://doi.org/10.7861/futurehosp.5-3-151> PMID: 31098557
13. Komashie A, Ward J, Bashford T, Dickerson T, Kaya GK, Liu Y, et al. Systems approach to health service design, delivery and improvement: a systematic review and meta-analysis. *BMJ open*. 2021; 11(1):e037667. <https://doi.org/10.1136/bmjopen-2020-037667> PMID: 33468455
14. van Galen LS, Lammers EM, Schoonmade LJ, Alam N, Kramer MH, Nanayakkara PW. Acute medical units: The way to go? A literature review. *European journal of internal medicine*. 2017; 39:24–31. <https://doi.org/10.1016/j.ejim.2016.11.001> PMID: 27843036
15. Elder E, Johnston AN, Crilly J. Review article: systematic review of three key strategies designed to improve patient flow through the emergency department. *Emergency medicine Australasia: EMA*. 2015; 27(5):394–404. <https://doi.org/10.1111/1742-6723.12446> PMID: 26206428
16. Raven MC, Kushel M, Ko MJ, Penko J, Bindman AB. The Effectiveness of Emergency Department Visit Reduction Programs: A Systematic Review. *Annals of emergency medicine*. 2016; 68(4):467–83 e15. <https://doi.org/10.1016/j.annemergmed.2016.04.015> PMID: 27287549
17. Moe J, Kirkland SW, Rawe E, Ospina MB, Vandermeer B, Campbell S, et al. Effectiveness of Interventions to Decrease Emergency Department Visits by Adult Frequent Users: A Systematic Review. *Academic emergency medicine: official journal of the Society for Academic Emergency Medicine*. 2017; 24(1):40–52. <https://doi.org/10.1111/acem.13060> PMID: 27473387
18. Chandrasekar T, Sharma A, Tennent L, Wong C, Chamberlain P, Abraham KA. A whole system approach to improving mortality associated with acute kidney injury. *QJM: monthly journal of the Association of Physicians*. 2017; 110(10):657–66. <https://doi.org/10.1093/qjmed/hcx101> PMID: 28521019
19. Leppin AL, Gionfriddo MR, Kessler M, Brito JP, Mair FS, Gallacher K, et al. Preventing 30-day hospital readmissions: a systematic review and meta-analysis of randomized trials. *JAMA internal medicine*. 2014; 174(7):1095–105. <https://doi.org/10.1001/jamainternmed.2014.1608> PMID: 24820131
20. Schroll JB, Moustgaard R, Gotzsche PC. Dealing with substantial heterogeneity in Cochrane reviews. Cross-sectional study. *BMC medical research methodology*. 2011; 11:22. <https://doi.org/10.1186/1471-2288-11-22> PMID: 21349195
21. Galvagno SM, Jr., Sikorski R, Hirshon JM, Floccare D, Stephens C, Beecher D, et al. Helicopter emergency medical services for adults with major trauma. *The Cochrane database of systematic reviews*. 2015(12):CD009228. <https://doi.org/10.1002/14651858.CD009228.pub3> PMID: 26671262
22. Jones P, Schimanski K. The four hour target to reduce Emergency Department 'waiting time': a systematic review of clinical outcomes. *Emergency medicine Australasia: EMA*. 2010; 22(5):391–8. <https://doi.org/10.1111/j.1742-6723.2010.01330.x> PMID: 20880296
23. Sprivilis PC, Da Silva JA, Jacobs IG, Frazer AR, Jelinek GA. The association between hospital overcrowding and mortality among patients admitted via Western Australian emergency departments. *The Medical journal of Australia*. 2006; 184(5):208–12. <https://doi.org/10.5694/j.1326-5377.2006.tb00416.x> PMID: 16515429



24. Proudlove NC, Gordon K, Boaden R. Can good bed management solve the overcrowding in accident and emergency departments? *Emergency medicine journal: EMJ*. 2003; 20(2):149–55. <https://doi.org/10.1136/emj.20.2.149> PMID: 12642528
25. Sun BC, Hsia RY, Weiss RE, Zingmond D, Liang LJ, Han W, et al. Effect of emergency department crowding on outcomes of admitted patients. *Annals of emergency medicine*. 2013; 61(6):605–11 e6. <https://doi.org/10.1016/j.annemergmed.2012.10.026> PMID: 23218508
26. Morley C, Unwin M, Peterson GM, Stankovich J, Kinsman L. Emergency department crowding: A systematic review of causes, consequences and solutions. *PloS one*. 2018; 13(8):e0203316. <https://doi.org/10.1371/journal.pone.0203316> PMID: 30161242
27. Richardson DB. Increase in patient mortality at 10 days associated with emergency department overcrowding. *The Medical journal of Australia*. 2006; 184(5):213–6. <https://doi.org/10.5694/j.1326-5377.2006.tb00204.x> PMID: 16515430
28. Guttman A, Schull MJ, Vermeulen MJ, Stukel TA. Association between waiting times and short term mortality and hospital admission after departure from emergency department: population based cohort study from Ontario, Canada. *Bmj*. 2011; 342:d2983. <https://doi.org/10.1136/bmj.d2983> PMID: 21632665
29. Plunkett PK, Byrne DG, Breslin T, Bennett K, Silke B. Increasing wait times predict increasing mortality for emergency medical admissions. *European journal of emergency medicine: official journal of the European Society for Emergency Medicine*. 2011; 18(4):192–6. <https://doi.org/10.1097/MEJ.0b013e328344917e> PMID: 21317786
30. Fee C, Weber EJ, Maak CA, Bacchetti P. Effect of emergency department crowding on time to antibiotics in patients admitted with community-acquired pneumonia. *Annals of emergency medicine*. 2007; 50(5):501–9, 9 e1. <https://doi.org/10.1016/j.annemergmed.2007.08.003> PMID: 17913300
31. Pines JM, Pollack CV Jr, Diercks DB, Chang AM, Shofer FS, Hollander JE. The association between emergency department crowding and adverse cardiovascular outcomes in patients with chest pain. *Academic emergency medicine: official journal of the Society for Academic Emergency Medicine*. 2009; 16(7):617–25. <https://doi.org/10.1111/j.1553-2712.2009.00456.x> PMID: 19549010
32. Schull MJ, Vermeulen M, Slaughter G, Morrison L, Daly P. Emergency department crowding and thrombolysis delays in acute myocardial infarction. *Annals of emergency medicine*. 2004; 44(6):577–85. <https://doi.org/10.1016/j.annemergmed.2004.05.004> PMID: 15573032
33. Ngo H, Forero R, Mountain D, Fatovich D, Man WN, Sprivilis P, et al. Impact of the Four-Hour Rule in Western Australian hospitals: Trend analysis of a large record linkage study 2002–2013. *PloS one*. 2018; 13(3):e0193902. <https://doi.org/10.1371/journal.pone.0193902> PMID: 29538401
34. Jones P, Wells S, Harper A, Le Fevre J, Stewart J, Curtis E, et al. Impact of a national time target for ED length of stay on patient outcomes. *The New Zealand medical journal*. 2017; 130(1455):15–34. PMID: 28494475
35. Tenbensen T, Chalmers L, Jones P, Appleton-Dyer S, Walton L, Ameratunga S. New Zealand's emergency department target—did it reduce ED length of stay, and if so, how and when? *BMC health services research*. 2017; 17(1):678. <https://doi.org/10.1186/s12913-017-2617-1> PMID: 28950856
36. Fact Full. Accident and emergency: attendances and performance: fullfact.org; 2018 [Available from: <https://fullfact.org/health/accident-and-emergency-attendances-and-performance/>].
37. Ahyow LC, Lambert PC, Jenkins DR, Neal KR, Tobin M. Bed occupancy rates and hospital-acquired *Clostridium difficile* infection: a cohort study. *Infection control and hospital epidemiology*. 2013; 34(10):1062–9. <https://doi.org/10.1086/673156> PMID: 24018923
38. Blom MC, Erwander K, Gustafsson L, Landin-Olsson M, Jonsson F, Ivarsson K. The probability of readmission within 30 days of hospital discharge is positively associated with inpatient bed occupancy at discharge—a retrospective cohort study. *BMC emergency medicine*. 2015; 15:37. <https://doi.org/10.1186/s12873-015-0067-9> PMID: 26666221
39. Cunningham JB, Kernohan WG, Sowney R. Bed occupancy and turnover interval as determinant factors in MRSA infections in acute settings in Northern Ireland: 1 April 2001 to 31 March 2003. *The Journal of hospital infection*. 2005; 61(3):189–93. <https://doi.org/10.1016/j.jhin.2005.04.014> PMID: 16153745
40. Kaier K, Luft D, Dettenkofer M, Kist M, Frank U. Correlations between bed occupancy rates and *Clostridium difficile* infections: a time-series analysis. *Epidemiology and infection*. 2011; 139(3):482–5. <https://doi.org/10.1017/S0950268810001214> PMID: 20513253
41. Yergens DW, Ghali WA, Faris PD, Quan H, Jolley RJ, Doig CJ. Assessing the association between occupancy and outcome in critically ill hospitalized patients with sepsis. *BMC emergency medicine*. 2015; 15:31. <https://doi.org/10.1186/s12873-015-0049-y> PMID: 26481448

42. Boden DG, Agarwal A, Hussain T, Martin SJ, Radford N, Riyat MS, et al. Lowering levels of bed occupancy is associated with decreased inhospital mortality and improved performance on the 4-hour target in a UK District General Hospital. *Emergency medicine journal: EMJ*. 2016; 33(2):85–90.
43. Madsen F, Ladelund S, Linneberg A. High levels of bed occupancy associated with increased inpatient and thirty-day hospital mortality in Denmark. *Health affairs*. 2014; 33(7):1236–44. <https://doi.org/10.1377/hlthaff.2013.1303> PMID: 25006151
44. Janke AT, Mei H, Rothenberg C, Becher RD, Lin Z, Venkatesh AK. Analysis of Hospital Resource Availability and COVID-19 Mortality Across the United States. *Journal of hospital medicine*. 2021; 16(4):211–4. <https://doi.org/10.12788/jhm.3539> PMID: 33496664
45. National Audit Office. Reducing Emergency Admissions. Department of Health & Social Care 2018.
46. Fekri O, Manukyan E, Klazinga N. Associations between hospital deaths (HSMR), readmission and length of stay (LOS): a longitudinal assessment of performance results and facility characteristics of teaching and large-sized hospitals in Canada between 2013–2014 and 2017–2018. *BMJ open*. 2021; 11(2):e041648. <https://doi.org/10.1136/bmjopen-2020-041648> PMID: 33550244
47. Hofstede SN, van Bodegom-Vos L, Kringos DS, Steyerberg E, Marang-van de Mheen PJ. Mortality, readmission and length of stay have different relationships using hospital-level versus patient-level data: an example of the ecological fallacy affecting hospital performance indicators. *BMJ quality & safety*. 2018; 27(6):474–83. <https://doi.org/10.1136/bmjqs-2017-006776> PMID: 28986516
48. Lingsma HF, Bottle A, Middleton S, Kievit J, Steyerberg EW, Marang-van de Mheen PJ. Evaluation of hospital outcomes: the relation between length-of-stay, readmission, and mortality in a large international administrative database. *BMC health services research*. 2018; 18(1):116. <https://doi.org/10.1186/s12913-018-2916-1> PMID: 29444713
49. Pouw ME, Peelen LM, Moons KG, Kalkman CJ, Lingsma HF. Including post-discharge mortality in calculation of hospital standardised mortality ratios: retrospective analysis of hospital episode statistics. *Bmj*. 2013; 347:f5913. <https://doi.org/10.1136/bmj.f5913> PMID: 24144869
50. Wunsch H, Linde-Zwirble WT, Harrison DA, Barnato AE, Rowan KM, Angus DC. Use of intensive care services during terminal hospitalizations in England and the United States. *American journal of respiratory and critical care medicine*. 2009; 180(9):875–80. <https://doi.org/10.1164/rccm.200902-0201OC> PMID: 19713448
51. Driessen RGH, Heijnen NFL, Hulsewe R, Holtkamp JWM, Winkens B, van de Poll MCG, et al. Early ICU-mortality in sepsis—causes, influencing factors and variability in clinical judgement: a retrospective cohort study. *Infectious diseases*. 2020:1–8. <https://doi.org/10.1080/23744235.2020.1821912> PMID: 32930619
52. Gopalan PD, Pershad S. Decision-making in ICU—A systematic review of factors considered important by ICU clinician decision makers with regard to ICU triage decisions. *Journal of critical care*. 2019; 50:99–110. <https://doi.org/10.1016/j.jcrc.2018.11.027> PMID: 30502690
53. Robert R, Coudroy R, Ragot S, Lesieur O, Runge I, Souday V, et al. Influence of ICU-bed availability on ICU admission decisions. *Annals of intensive care*. 2015; 5(1):55. <https://doi.org/10.1186/s13613-015-0099-z> PMID: 26714805
54. Tarnow-Mordi WO, Hau C, Warden A, Shearer AJ. Hospital mortality in relation to staff workload: a 4-year study in an adult intensive-care unit. *Lancet*. 2000; 356(9225):185–9. [https://doi.org/10.1016/S0140-6736\(00\)02478-8](https://doi.org/10.1016/S0140-6736(00)02478-8) PMID: 10963195
55. Pronovost PJ, Angus DC, Dorman T, Robinson KA, Dremsizov TT, Young TL. Physician staffing patterns and clinical outcomes in critically ill patients: a systematic review. *Jama*. 2002; 288(17):2151–62. <https://doi.org/10.1001/jama.288.17.2151> PMID: 12413375
56. Griffiths P, Ball J, Murrells T, Jones S, Rafferty AM. Registered nurse, healthcare support worker, medical staffing levels and mortality in English hospital trusts: a cross-sectional study. *BMJ open*. 2016; 6(2):e008751. <https://doi.org/10.1136/bmjopen-2015-008751> PMID: 26861934
57. Bray BD, Ayis S, Campbell J, Cloud GC, James M, Hoffman A, et al. Associations between stroke mortality and weekend working by stroke specialist physicians and registered nurses: prospective multi-centre cohort study. *PLoS medicine*. 2014; 11(8):e1001705. <https://doi.org/10.1371/journal.pmed.1001705> PMID: 25137386
58. Griffiths P, Ball J, Bloor K, Bohning D, Briggs J, Dall'Ora C, et al. Nurse staffing levels, missed vital signs and mortality in hospitals: retrospective longitudinal observational study. *Nurse staffing levels, missed vital signs and mortality in hospitals: retrospective longitudinal observational study*. Health Services and Delivery Research. Southampton (UK)2018.
59. Haegdorens F, Van Bogaert P, De Meester K, Monsieurs KG. The impact of nurse staffing levels and nurse's education on patient mortality in medical and surgical wards: an observational multicentre study. *BMC health services research*. 2019; 19(1):864. <https://doi.org/10.1186/s12913-019-4688-7> PMID: 31752859

60. West E, Barron DN, Harrison D, Rafferty AM, Rowan K, Sanderson C. Nurse staffing, medical staffing and mortality in Intensive Care: An observational study. *International journal of nursing studies*. 2014; 51(5):781–94. <https://doi.org/10.1016/j.ijnurstu.2014.02.007> PMID: 24636667
61. Jung M, Park H, Kang D, Park E, Jeon K, Chung CR, et al. The effect of bed-to-nurse ratio on hospital mortality of critically ill children on mechanical ventilation: a nationwide population-based study. *Annals of intensive care*. 2020; 10(1):159. <https://doi.org/10.1186/s13613-020-00780-7> PMID: 33257997
62. Hugonnet S, Chevrolet JC, Pittet D. The effect of workload on infection risk in critically ill patients. *Critical care medicine*. 2007; 35(1):76–81. <https://doi.org/10.1097/01.CCM.0000251125.08629.3F> PMID: 17095946
63. Organisation for Economic Co-operation and Development. Data.OECD 2021 [Available from: <https://data.oecd.org/healthres/doctors.htm#indicator-chart>].
64. Ward DK, Chijoko L. Spending on and availability of health care resources: how does the UK compare to other countr. *The King's Fund*; 2018.
65. Xie L, Yang H, Zheng X, Wu Y, Lin X, Shen Z. Medical resources and coronavirus disease (COVID-19) mortality rate: Evidence and implications from Hubei province in China. *PloS one*. 2021; 16(1): e0244867. <https://doi.org/10.1371/journal.pone.0244867> PMID: 33449940
66. Bravata DM, Perkins AJ, Myers LJ, Arling G, Zhang Y, Zillich AJ, et al. Association of Intensive Care Unit Patient Load and Demand With Mortality Rates in US Department of Veterans Affairs Hospitals During the COVID-19 Pandemic. *JAMA network open*. 2021; 4(1):e2034266. <https://doi.org/10.1001/jamanetworkopen.2020.34266> PMID: 33464319
67. Bion J, Aldridge C, Girling AJ, Rudge G, Sun J, Tarrant C, et al. Changes in weekend and weekday care quality of emergency medical admissions to 20 hospitals in England during implementation of the 7-day services national health policy. *BMJ quality & safety*. 2021; 30(7):536–46. <https://doi.org/10.1136/bmjqs-2020-011165> PMID: 33115851
68. Flojstrup M, Henriksen DP, Brabrand M. An acute hospital admission greatly increases one year mortality—Getting sick and ending up in hospital is bad for you: A multicentre retrospective cohort study. *European journal of internal medicine*. 2017; 45:5–7. <https://doi.org/10.1016/j.ejim.2017.09.035> PMID: 28988718
69. Cooke MW, Wilson S, Halsall J, Roalfe A. Total time in English accident and emergency departments is related to bed occupancy. *Emergency medicine journal: EMJ*. 2004; 21(5):575–6. <https://doi.org/10.1136/emj.2004.015081> PMID: 15333534
70. Weber EJ, Mason S, Carter A, Hew RL. Emptying the corridors of shame: organizational lessons from England's 4-hour emergency throughput target. *Annals of emergency medicine*. 2011; 57(2):79–88 e1. <https://doi.org/10.1016/j.annemergmed.2010.08.013> PMID: 21251521
71. Keogh B, Culliford D, Guerrero-Luduena R, Monks T. Exploring emergency department 4-hour target performance and cancelled elective operations: a regression analysis of routinely collected and openly reported NHS trust data. *BMJ open*. 2018; 8(5):e020296. <https://doi.org/10.1136/bmjopen-2017-020296> PMID: 29794093
72. NHS England. Statistical work areas [Available from: <https://www.england.nhs.uk/statistics/statistical-work-areas/>].
73. Freemantle N, Ray D, McNulty D, Rosser D, Bennett S, Keogh BE, et al. Increased mortality associated with weekend hospital admission: a case for expanded seven day services? *Bmj*. 2015; 351: h4596. <https://doi.org/10.1136/bmj.h4596> PMID: 26342923
74. Braithwaite J, Hibbert P, Blakely B, Plumb J, Hannaford N, Long JC, et al. Health system frameworks and performance indicators in eight countries: A comparative international analysis. *SAGE open medicine*. 2017; 5:2050312116686516. <https://doi.org/10.1177/2050312116686516> PMID: 28228948
75. Barclay M, Dixon-Woods M, Lyrtzopoulos G. The problem with composite indicators. *BMJ quality & safety*. 2018. <https://doi.org/10.1136/bmjqs-2018-007798> PMID: 30100565
76. Cordoba G, Schwartz L, Woloshin S, Bae H, Gotzsche PC. Definition, reporting, and interpretation of composite outcomes in clinical trials: systematic review. *Bmj*. 2010; 341:c3920. <https://doi.org/10.1136/bmj.c3920> PMID: 20719825
77. Bevan G, Hood C. What's measured is what matters: Targets and gaming in the English public health-care system. *Public Administration*. 2006; 84(3):517–38.
78. Bardsley M, Spiegelhalter DJ, Blunt I, Chitnis X, Roberts A, Bharania S. Using routine intelligence to target inspection of healthcare providers in England. *Quality & safety in health care*. 2009; 18(3):189–94. <https://doi.org/10.1136/qshc.2007.024802> PMID: 19468000
79. Spiegelhalter DJ, Sherlaw-Johnson C, Bardsley M, Blunt I, Wood C, Grigg O. Statistical methods for healthcare regulation: rating, screening and surveillance. *Journal of the Royal Statistical Society*. 2011; 175(1).

80. Griffiths A, Beaussier AL, Demeritt D, Rothstein H. Intelligent Monitoring? Assessing the ability of the Care Quality Commission's statistical surveillance tool to predict quality and prioritise NHS hospital inspections. *BMJ quality & safety*. 2017; 26(2):120–30. <https://doi.org/10.1136/bmjqs-2015-004687> PMID: 27090161
81. Smithson R, Richardson E, Roberts J, Walshe K, Wenzel L, Robertson R, et al. Impact of the Care Quality Commission on provider performance: Room for improvement? Manchester, UK: The King's Fund & The University of Manchester; 2018.
82. NHS Digital. Summary Hospital-level Mortality Indicator (SHMI)—Deaths associated with hospitalisation 2020 [Available from: <https://digital.nhs.uk/data-and-information/publications/statistical/shmi>].
83. Baek H, Cho M, Kim S, Hwang H, Song M, Yoo S. Analysis of length of hospital stay using electronic health records: A statistical and data mining approach. *PloS one*. 2018; 13(4):e0195901. <https://doi.org/10.1371/journal.pone.0195901> PMID: 29652932
84. Keighley D. Personal Communication with NHS Digital, Re: SMR Data. 2020.
85. Girling AJ, Hofer TP, Wu J, Chilton PJ, Nicholl JP, Mohammed MA, et al. Case-mix adjusted hospital mortality is a poor proxy for preventable mortality: a modelling study. *BMJ quality & safety*. 2012; 21(12):1052–6. <https://doi.org/10.1136/bmjqs-2012-001202> PMID: 23069860
86. Campbell MJ, Jacques RM, Fotheringham J, Maheswaran R, Nicholl J. Developing a summary hospital mortality index: retrospective analysis in English hospitals over five years. *Bmj*. 2012; 344:e1001. <https://doi.org/10.1136/bmj.e1001> PMID: 22381521
87. Hogan H, Zipfel R, Neuburger J, Hutchings A, Darzi A, Black N. Avoidability of hospital deaths and association with hospital-wide mortality ratios: retrospective case record review and regression analysis. *Bmj*. 2015; 351:h3239. <https://doi.org/10.1136/bmj.h3239> PMID: 26174149
88. Ahmad A, Purewal TS, Sharma D, Weston PJ. The impact of twice-daily consultant ward rounds on the length of stay in two general medical wards. *Clinical medicine*. 2011; 11(6):524–8. <https://doi.org/10.7861/clinmedicine.11-6-524> PMID: 22268301
89. Singh S, Lipscomb G, Padmakumar K, Ramamoorthy R, Ryan S, Bates V, et al. Daily consultant gastroenterologist ward rounds: reduced length of stay and improved inpatient mortality. *Frontline gastroenterology*. 2012; 3(1):29–33. <https://doi.org/10.1136/flgastro-2011-100033> PMID: 28839627
90. Bell D, Lambourne A, Percival F, Lavery AA, Ward DK. Consultant input in acute medical admissions and patient outcomes in hospitals in England: a multivariate analysis. *PloS one*. 2013; 8(4):e61476. <https://doi.org/10.1371/journal.pone.0061476> PMID: 23613858
91. Vincent C, Taylor-Adams S, Stanhope N. Framework for analysing risk and safety in clinical medicine. *Bmj*. 1998; 316(7138):1154–7. <https://doi.org/10.1136/bmj.316.7138.1154> PMID: 9552960
92. Wyatt S. Changes in the Acuity of Patients Presenting at Emergency Departments and the Propensity of Emergency Departments to Admit Patients in England (2010 to 2016). The Strategy Unit; 2017.
93. Montes FR, Vasquez SM, Camargo-Rojas CM, Rueda MV, Goez-Mogollon L, Alvarado PA, et al. Association between emergency department length of stay and adverse perioperative outcomes in emergency surgery: a cohort study in two Colombian University hospitals. *BMC emergency medicine*. 2019; 19(1):27. <https://doi.org/10.1186/s12873-019-0241-6> PMID: 30995927
94. Jones EM, Boehme AK, Aysenne A, Chang T, Albright KC, Burns C, et al. Prolonged Emergency Department Length of Stay as a Predictor of Adverse Outcomes in Patients with Intracranial Hemorrhage. *Journal of critical care medicine*. 2015; 2015(2015). <https://doi.org/10.1155/2015/526319> PMID: 26473167
95. Chalfin DB, Trzeciak S, Likourezos A, Baumann BM, Dellinger RP, group D-Es. Impact of delayed transfer of critically ill patients from the emergency department to the intensive care unit. *Critical care medicine*. 2007; 35(6):1477–83. <https://doi.org/10.1097/01.CCM.0000266585.74905.5A> PMID: 17440421
96. Rincon F, Mayer SA, Rivolta J, Stillman J, Boden-Albala B, Elkind MS, et al. Impact of delayed transfer of critically ill stroke patients from the Emergency Department to the Neuro-ICU. *Neurocritical care*. 2010; 13(1):75–81. <https://doi.org/10.1007/s12028-010-9347-0> PMID: 20428969
97. Parkhe M, Myles PS, Leach DS, Maclean AV. Outcome of emergency department patients with delayed admission to an intensive care unit. *Emergency medicine*. 2002; 14(1):50–7. <https://doi.org/10.1046/j.1442-2026.2002.00286.x> PMID: 11993835
98. Royal College of Nursing. Safe and Effective Staffing: Nursing Against the Odds. 2017.
99. Royal College of Nursing. Guidance on safe nursing staffing levels in the U.K.; 2010.
100. Kerlin MP. Staffing of healthcare workers and patient mortality: randomized trials needed. *PLoS medicine*. 2014; 11(8):e1001706. <https://doi.org/10.1371/journal.pmed.1001706> PMID: 25137486
101. Redfern OC, Griffiths P, Maruotti A, Recio Saucedo A, Smith GB, Missed Care Study G. The association between nurse staffing levels and the timeliness of vital signs monitoring: a retrospective

- observational study in the UK. *BMJ open*. 2019; 9(9):e032157. <https://doi.org/10.1136/bmjopen-2019-032157> PMID: 31562161
102. Zegers M, de Bruijne MC, Wagner C, Hoonhout LH, Waaijman R, Smits M, et al. Adverse events and potentially preventable deaths in Dutch hospitals: results of a retrospective patient record review study. *Quality & safety in health care*. 2009; 18(4):297–302. <https://doi.org/10.1136/qshc.2007.025924> PMID: 19651935
  103. Pitches DW, Mohammed MA, Lilford RJ. What is the empirical evidence that hospitals with higher-risk adjusted mortality rates provide poorer quality care? A systematic review of the literature. *BMC health services research*. 2007; 7(1):91. <https://doi.org/10.1186/1472-6963-7-91> PMID: 17584919
  104. Lilford R, Pronovost P. Using hospital mortality rates to judge hospital performance: a bad idea that just won't go away. *Bmj*. 2010; 340:c2016. <https://doi.org/10.1136/bmj.c2016> PMID: 20406861
  105. Hogan H, Healey F, Neale G, Thomson R, Vincent C, Black N. Preventable deaths due to problems in care in English acute hospitals: a retrospective case record review study. *BMJ quality & safety*. 2012; 21(9):737–45. <https://doi.org/10.1136/bmjqs-2011-001159> PMID: 22927487
  106. Barton JC, Richardson D, Corrigan AE, Kuri A, Round J. Hospital Mortality and Trainee Experiences: How General Medical Council Survey Findings Correlate With Summary Hospital-Level Mortality Indicator. *J Patient Saf*. 2023; 19(2):79–85. <https://doi.org/10.1097/PTS.0000000000001095> PMID: 36728852
  107. Borrelli AM, Birch RJ, Spencer K. How does staff and patient feedback on hospital quality relate to mortality outcomes? A provider-level national study. *Health Serv Manage Res*. 2023;9514848231179182. <https://doi.org/10.1177/09514848231179182> PMID: 37368436
  108. NHS England. Summary Hospital-level Mortality Indicator (SHMI): Users and uses statement. 2023.
  109. Freemantle N, Richardson M, Wood J, Ray D, Khosla S, Sun P, et al. Can we update the Summary Hospital Mortality Index (SHMI) to make a useful measure of the quality of hospital care? An observational study. *BMJ open*. 2013; 3(1). <https://doi.org/10.1136/bmjopen-2012-002018> PMID: 23370014
